# Supplementary material for: Saponins Extracted from Tea (Camellia Sinensis) Flowers Induces Autophagy in Ovarian Cancer Cells
Source: MDPI journal article supplement (doi:10.3390/molecules25225254), 2020-11-11
Supplement: s1 [file s1]

**Saponins extracted from tea (*Camellia sinensis*) flower induces autophagy in  
ovarian cancer cells**

Yaomin Wang<sup>a†</sup>, Chen Xia<sup>b†</sup>, Lianfu Chen<sup>a</sup>, Yi Charlie Chen<sup>c\*</sup>, Youying Tu<sup>a\*\*</sup>

<sup>a</sup>Department of Tea Science, Zhejiang University, Hangzhou 310058, P.R. China

<sup>b</sup>Hangzhou Yingshili Biotechnology Co., Ltd, Hangzhou 310000, P.R. China

<sup>c</sup>College of Science, Technology and Mathematics, Alderson Broaddus University,  
Philippi, WV 26416, USA

<sup>\*\*</sup> Corresponding author. Department of Tea Science, Zhejiang University, 866  
Yuhangtang Road, Hangzhou 310058, P.R. China. Tel: +86 0571 88982743; Fax: +86  
0571 88982743.

E-mail address: youytu@zju.edu.cn (Y. Tu).

<sup>\*</sup> Corresponding author. College of Science, Technology and Mathematics, Alderson  
Broaddus University, 101 College Hill Drive Philippi, WV 26416, USA. Tel.: +1 304  
457 6277; fax: +1 304 457 6239.

E-mail address: chenyc@ab.edu (Y.C. Chen).

---

<sup>†</sup> The authors should be considered equal contributors to this paper.

## Supplementary Figures

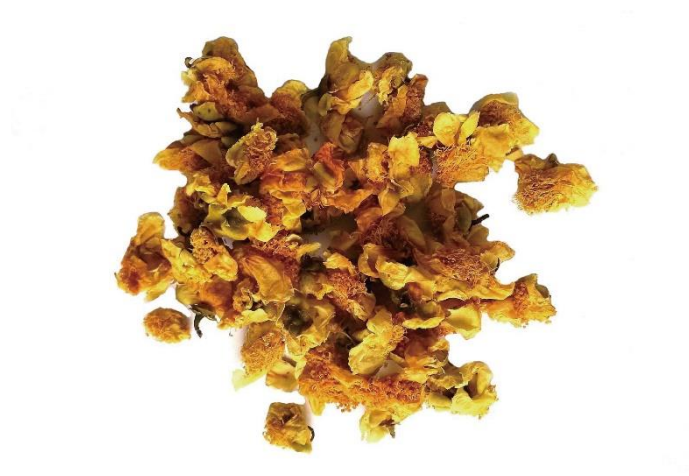

**Figure S1. Dried tea (*Camellia sinensis*) flowers.**

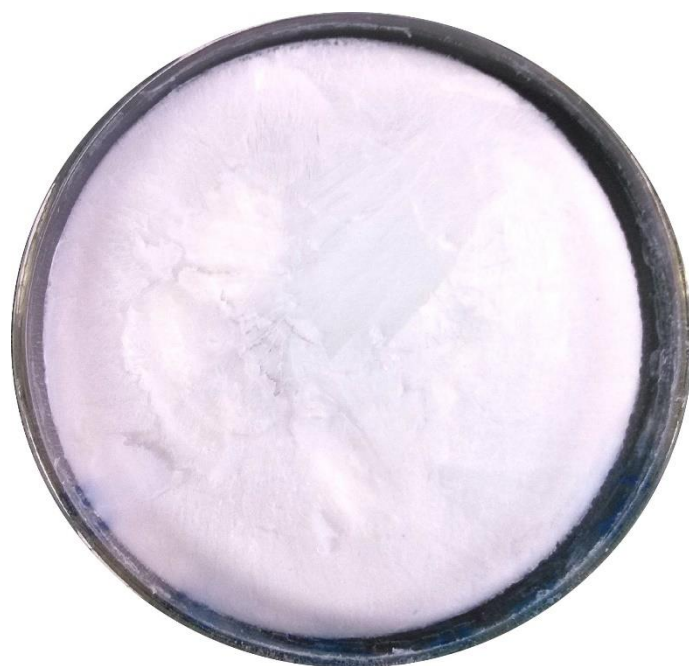

**Figure S2. Saponins isolated from dried tea (*Camellia sinensis*) flowers.**

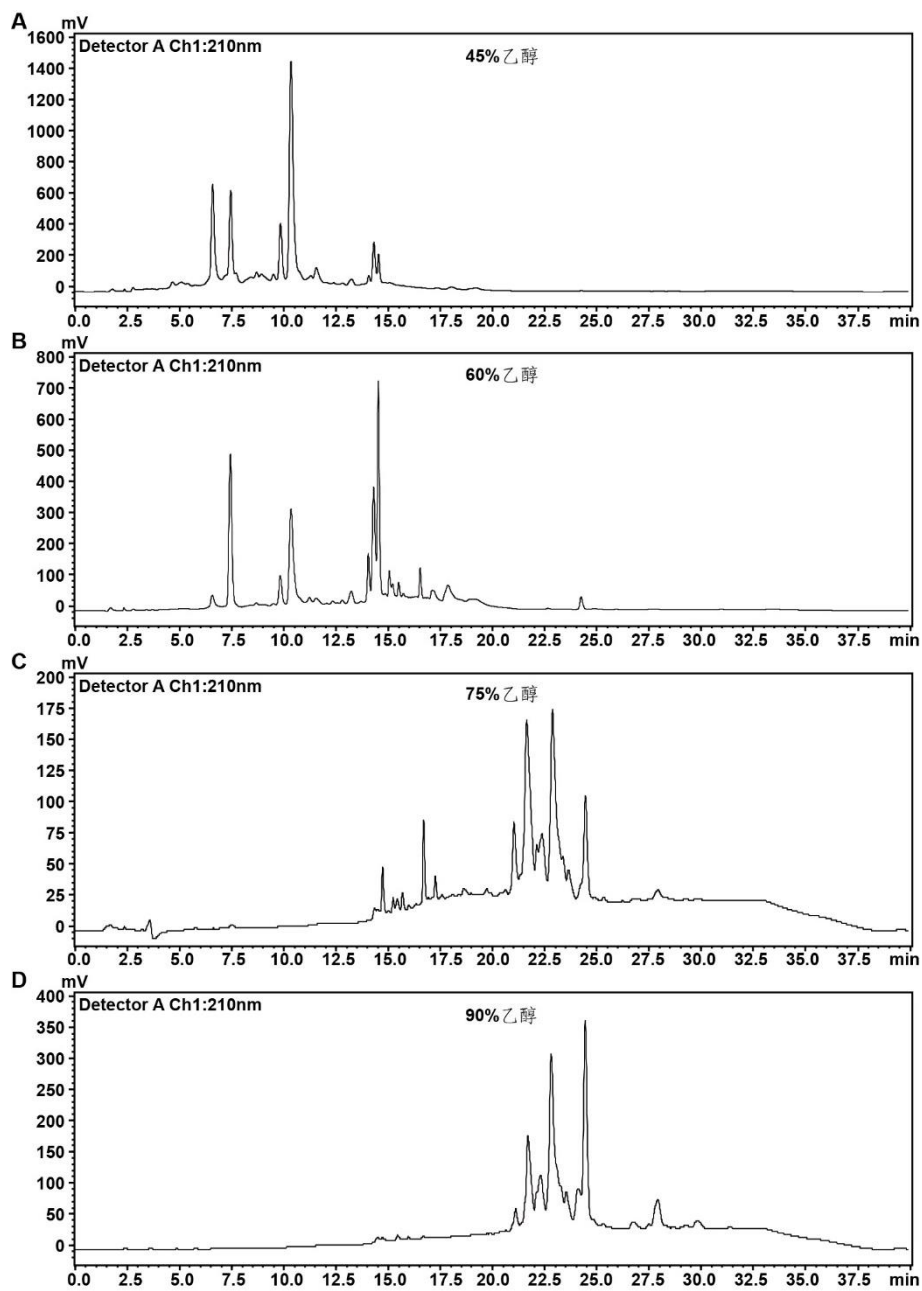

**Figure S3. HPLC chromatograms of eluted fractions of 45%, 60%, 75%, 90% ethanol.**

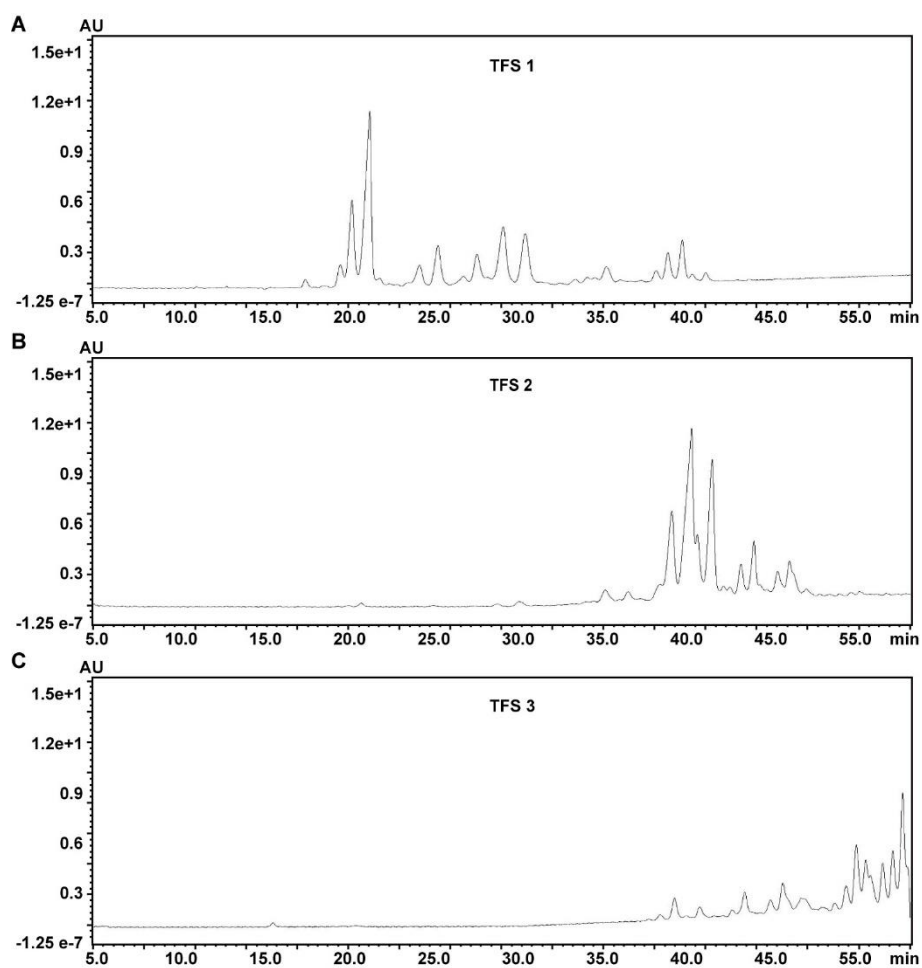

**Figure S4. Chromatograms of TFS 1, TFS 2 and TFS 3 detected by LC/MS.**
